# Supplementary material for: Comprehensive gene and pathway analysis of cervical cancer progression
Source: PubMed Central journal article supplement — Oncol Lett. 2020 Mar 3;19(4):3316–32. doi: 10.3892/ol.2020.11439 (PMC7074609; doi:10.3892/ol.2020.11439), 2020-03-03

Figure S1. Pathway crosstalk analysis of phases I-IV. (A) Phase I, (B) phase II, (C) phase III and (D) phase IV. Nodes represent pathways and edge-width corresponds to the score of the specific pathway pair. Larger edge-width indicates higher score. In (B) 1 represents ‘Ensemble of genes encoding ECM-associated proteins including ECM-affiliated proteins, ECM regulators and secreted factors’ and 2 represent ‘Ensemble of gene encoding extracellular matrix and extracellular matrix-associated proteins’.

A

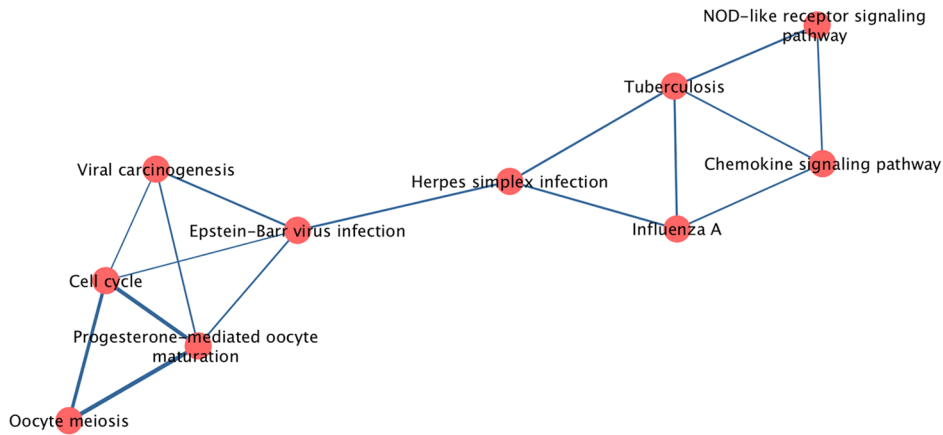

B

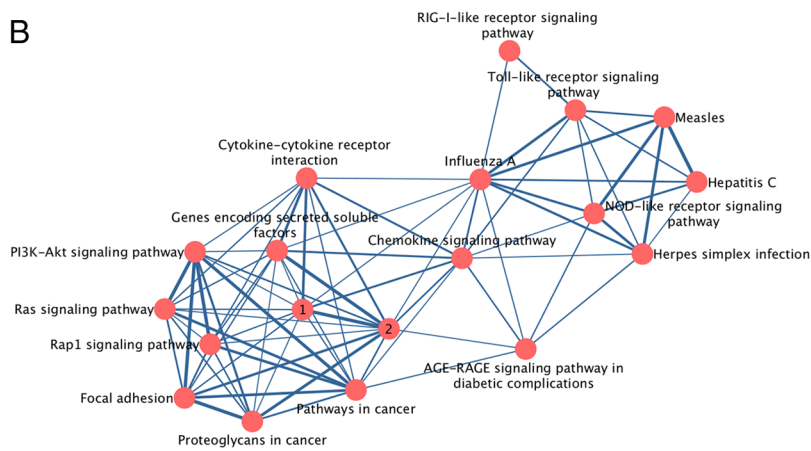

C

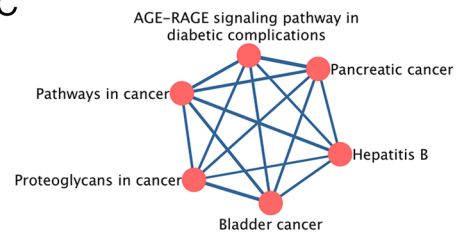

D

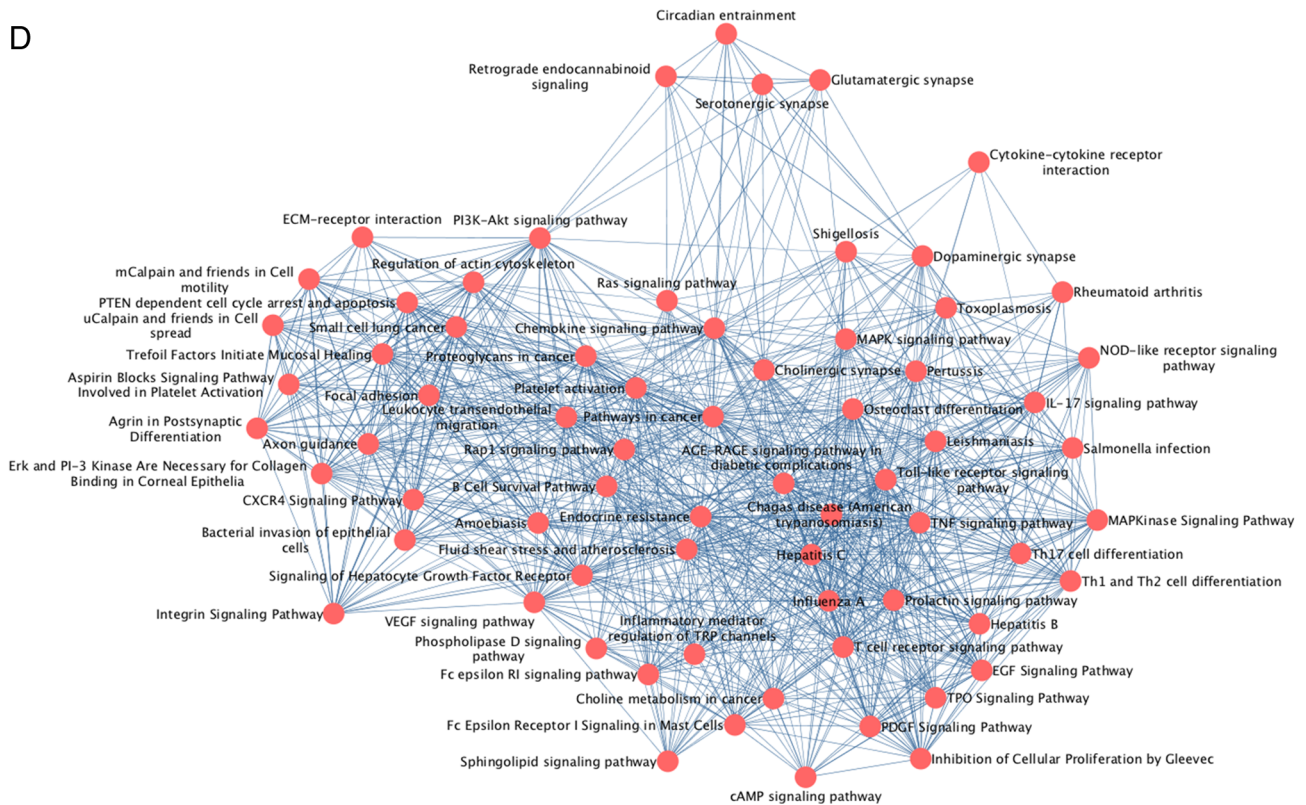

Supplement: Supplementary_Data.pdf [file Supplementary_Data.pdf]
